# Supplementary material for: Carbon adsorption on doped cementite surfaces for effective catalytic growth of diamond-like carbon: a first-principles study
Source: Royal Society of Chemistry journal article supplement (doi:10.1039/c7cp06598a), 2017-01-01
Supplement: c7cp06598a1.pdf [file c7cp06598a1.pdf]

Electronic Supplementary Information

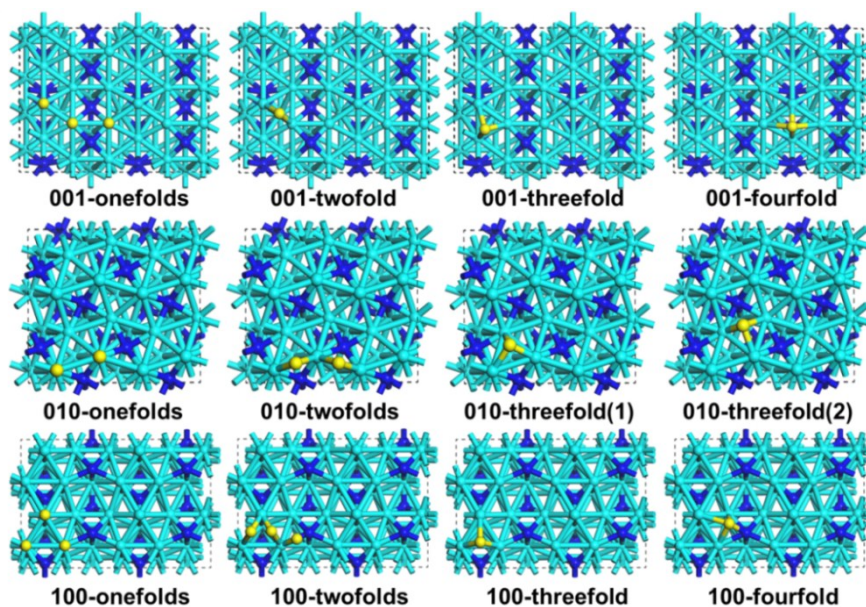

Figure S1- Adsorption structures of carbon on  $\text{Fe}_3\text{C}$ : Fe and C and adsorbed C atoms are in green, blue, and yellow, respectively <sup>[16]</sup>

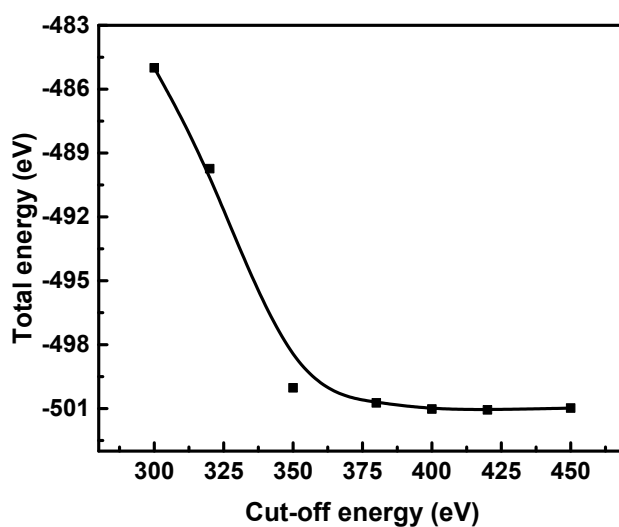

Figure S2 - convergence tests for cut-off energy ( $\text{Fe}_3\text{C}$  slab system)

Table S1- convergence tests for k-points sampling

| Cut-off energy | k-points | Total energy (eV) |
|----------------|----------|-------------------|
| 400 eV         | 8×6×9    | -135.3382         |
|                | 9×6×10   | -135.3401         |
|                | 9×7×11   | -135.3404         |
|                | 10×7×11  | -135.3404         |
|                | 10×8×12  | -135.3405         |
|                | 11×8×12  | -135.3407         |
|                | 12×9×13  | -135.3407         |
|                | 12×9×14  | -135.3403         |

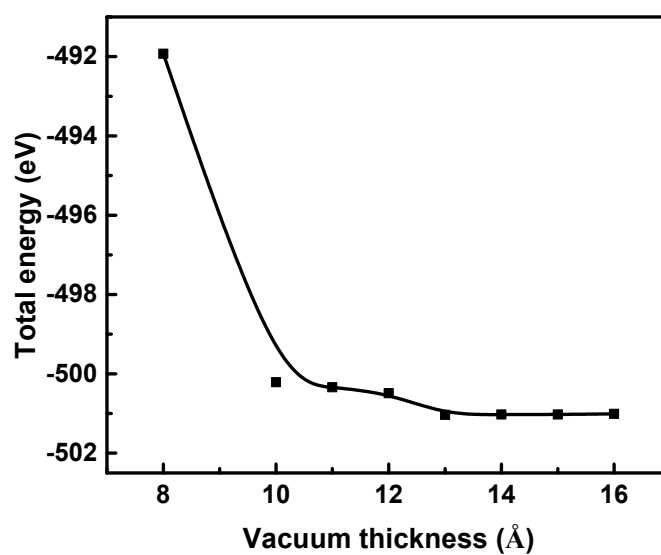

Figure S3- convergence tests for vacuum thickness
